# Supplementary material for: Effect of Scrapie Prion Infection in Ovine Bone Marrow-Derived Mesenchymal Stem Cells and Ovine Mesenchymal Stem Cell-Derived Neurons
Source: MDPI journal article supplement (doi:10.3390/ani11041137), 2021-04-15
Supplement: s1 [file s1]

**Supplementary Materials:** The following are available online at [www.mdpi.com/xxx/s1](http://www.mdpi.com/xxx/s1), Figure S1: Calibration curves used in the MTT assay: (a) calibration curve used to establish the relationship between absorbance and the amount of MSCs in growth conditions ( $r^2 = 0.96$ ) and (b) calibration curve used to establish the relationship between absorbance and the amount of MSCs in neurogenic conditions ( $r^2 = 0.98$ ). Figure S2: Calibration logarithmic curve used to evaluate the sensitivity of PrP<sup>Sc</sup> detection of the EEB-Scrapie HerdCheck kit, where  $y = 0.626\ln(x) + 0.4023$  and  $r^2 = 0.9911$ . Figure S3: Full Western blotting membranes used for PrP<sup>Sc</sup> determination in oBM-MSCs (BM1, BM2, BM3) infected with scrapie inocula at passages 1 to 3 (P1, P2, P3). MWSC = molecular weight marker; C (+) = positive control.

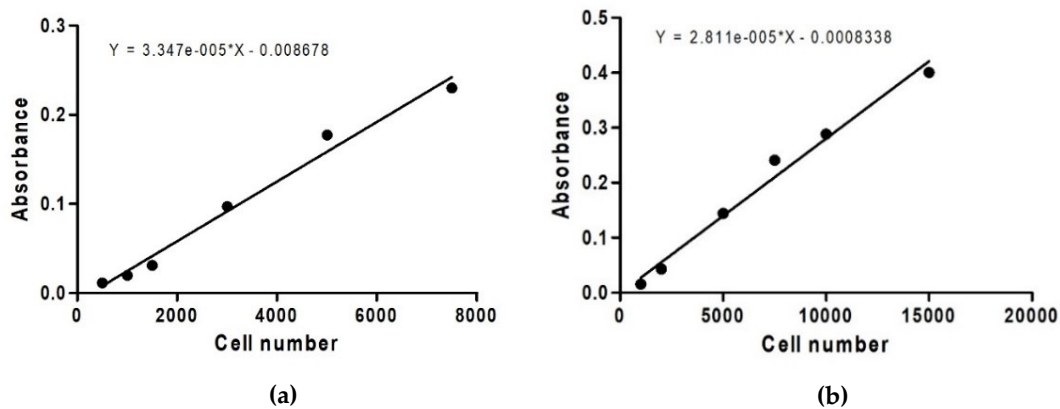

**Figure S1.** Calibration curves used in the MTT assay: a) calibration curve used to establish the relationship between absorbance and the amount of MSCs in growth conditions ( $r^2 = 0.96$ ) and b) calibration curve used to establish the relationship between absorbance and the amount of MSCs in neurogenic conditions ( $r^2 = 0.98$ ).

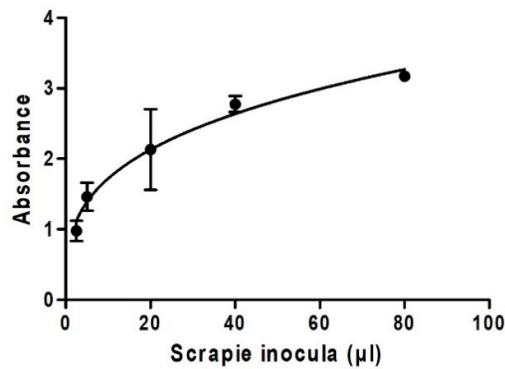

**Figure S2.** Calibration logarithmic curve used to evaluate the sensitivity of PrP<sup>Sc</sup> detection of EEB-Scrapie HerdCheck kit, where  $y = 0.626\ln(x) + 0.4023$  and  $r^2 = 0.9911$ .

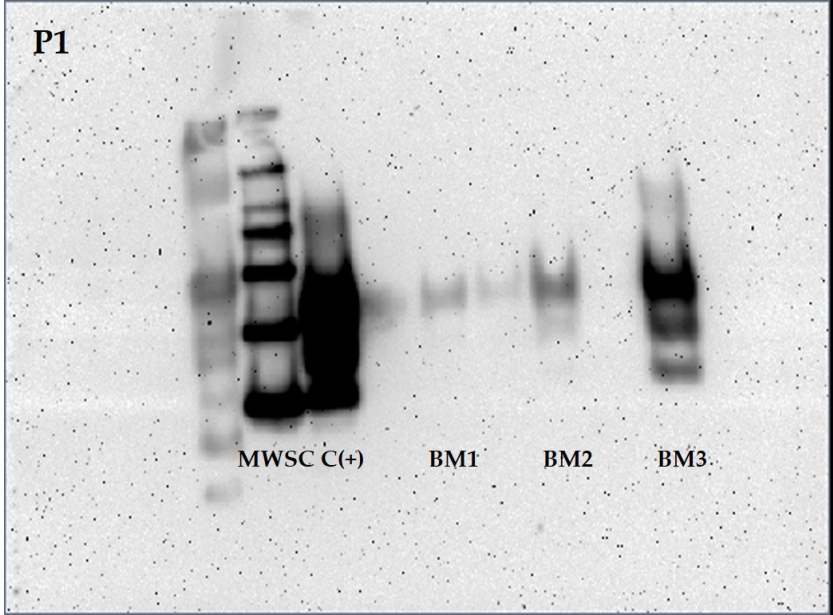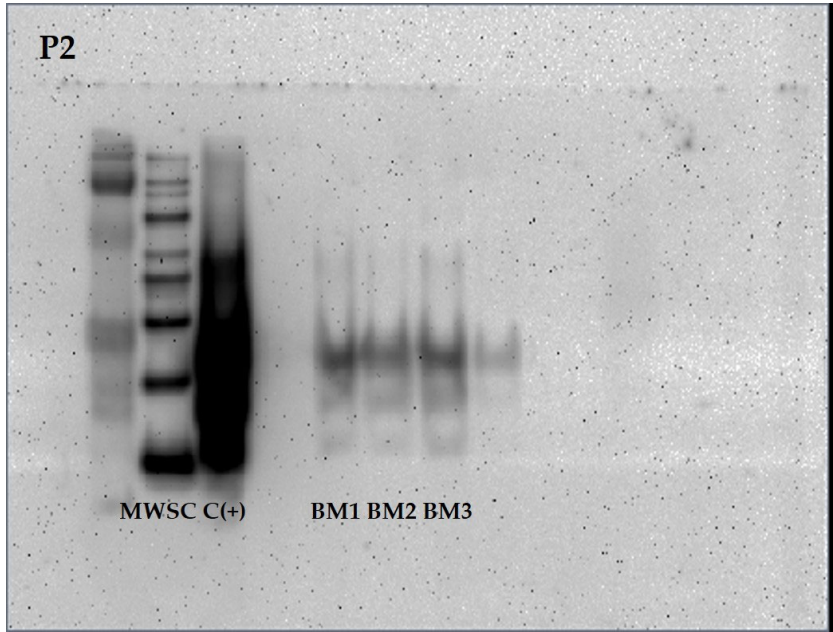

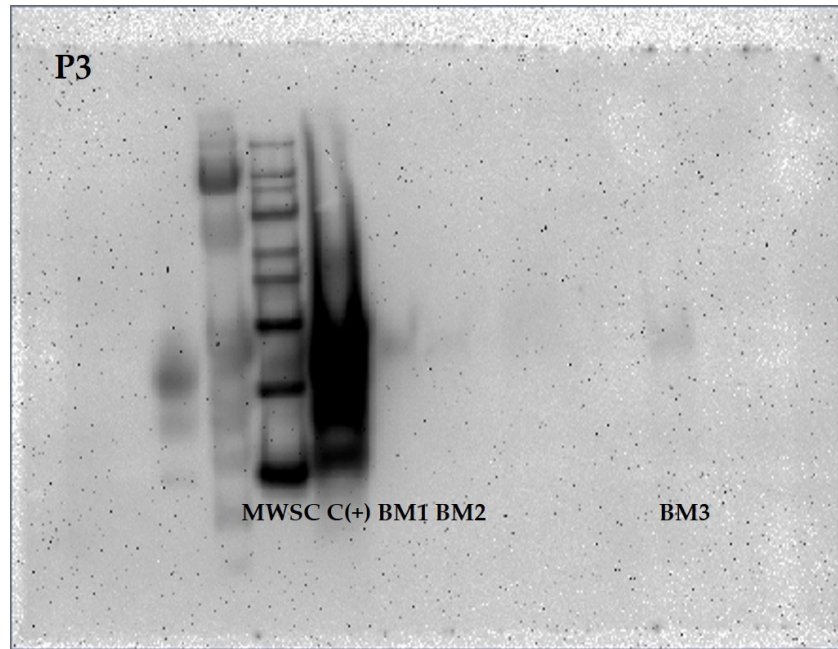

**Figure S3.** Full Western-Blotting membranes of PrP<sup>Sc</sup> determination in oBM-MSCs (BM1, BM2, BM3) infected with scrapie inocula at passages 1 to 3 (P1, P2, P3). MWSC= Molecular weight marker; C (+) = Positive control.
